# Supplementary material
Source: Springer Nature journal article supplement (https://www.springermedizin.de/resource/supplementary/13229_2014_131_MOESM1_ESM.pdf/9676246)
Supplement: MOESM1 [file 9676246]

TD

n=37

Exclusions-technical issues

n=34

Exclusions-behavioral issues

n=34

Exclusions-other issues

n=34

ASD

n=47

n=44

n=41

n=40
